# Supplementary material for: Evaluation of four commercial quantitative real-time PCR kits with inhibited and degraded samples
Source: Springer Nature journal article supplement (doi:10.1007/s00414-017-1745-9), 2017-11-24
Supplement: MOESM1 [file 15251672]

**Supplemental Table 1.** Inhibitor sample concentrations

| Inhibitor Concentrations in DNA Sample | | | | |
| --- | --- | --- | --- | --- |
| Hematin (µM) | Humic Acid (ng/µL) | Calcium (mM) | Melanin (ng/µL) | Salt  (mM) |
| 30 | 10 | 1 | 10 | 100 |
| 50 | 20 | 1.5 | 25 | 200 |
| 70 | 30 | 2 | 50 | 300 |
| 90 | 40 | 2.5 | 75 | 400 |
| 110 | 50 | 3 | 100 | 500 |
| 500 | 100 | 15 | 175 | 600 |
| 600 | 200 | 20 | 200 | 700 |
| 700 | 250 | 25 | 225 | 800 |
| 800 | 300 | 30 | 250 | 900 |
| 900 | 400 | 35 | 275 | 1000 |
