# Supplementary material for: Evaluation of four commercial quantitative real-time PCR kits with inhibited and degraded samples
Source: Springer Nature journal article supplement (doi:10.1007/s00414-017-1745-9), 2017-11-24
Supplement: MOESM3 [file 15251672]

**Supplemental Table 3.** Sensitivity and Accuracy results of NIST SRM 2372 Component A and Component B dilutions for Quantifiler Trio

| Sample Source | Expected Conc. (ng/µL) | Observed Small | | | | Observed Large | | | | Observed Y | | | |
| --- | --- | --- | --- | --- | --- | --- | --- | --- | --- | --- | --- | --- | --- |
| Avg. Quantity | Std. Dev. | Fold Change | %CV | Avg. Quantity | Std. Dev. | Fold Change | %CV | Avg. Quantity | Std. Dev. | Fold Change | %CV |
| NIST A SRM | 57.0 | 51.3 | 1.0 | 1.11 | 2.0% | 55.0 | 3.2 | 1.04 | 5.9% | 68.2 | 0.6 | 1.20 | 0.9% |
|  | 20.0 | 18.5 | 0.4 | 1.08 | 2.3% | 21.9 | 1.1 | 1.10 | 5.1% | 25.4 | 0.5 | 1.27 | 2.0% |
|  | 2.50 | 2.48 | 0.17 | 1.01 | 6.9% | 3.11 | 0.11 | 1.25 | 3.4% | 3.37 | 0.14 | 1.35 | 4.3% |
|  | 0.313 | 0.278 | 0.013 | 1.13 | 4.6% | 0.382 | 0.014 | 1.22 | 3.6% | 0.397 | 0.017 | 1.27 | 4.3% |
|  | 0.0390 | 0.0358 | 0.0042 | 1.09 | 11.6% | 0.0523 | 0.0015 | 1.34 | 3.0% | 0.0501 | 0.0049 | 1.29 | 9.7% |
|  | 5.00E-03 | 3.55E-03 | 1.58E-04 | 1.41 | 4.5% | 5.85E-03 | 1.20E-03 | 1.17 | 20.5% | 5.25E-03 | 1.48E-03 | 1.05 | 28.2% |
|  | 6.25E-04 | 5.42E-04 | 1.62E-04 | 1.15 | 29.9% | 8.65E-04 | 6.24E-04 | 1.38 | 72.1% | 6.74E-04 | 3.10E-04 | 1.08 | 46.1% |
|  |  |  |  |  |  |  |  |  |  |  |  |  |  |
| NIST B SRM | 61.0 | 41.6 | 9.4 | 1.47 | 22.5% | 46.2 | 8.0 | 1.32 | 17.2% | 0 | - | - | - |
|  | 20.0 | 15.3 | 2.2 | 1.30 | 14.2% | 18.8 | 2.1 | 1.07 | 11.4% | 0 | - | - | - |
|  | 2.50 | 1.86 | 0.50 | 1.34 | 26.8% | 2.66 | 0.57 | 1.06 | 21.3% | 0 | - | - | - |
|  | 0.313 | 0.288 | 0.058 | 1.09 | 20.1% | 0.394 | 0.075 | 1.26 | 19.0% | 0 | - | - | - |
|  | 0.0390 | 0.0262 | 0.0067 | 1.49 | 25.6% | 0.0449 | 0.0095 | 1.15 | 21.1% | 0 | - | - | - |
|  | 5.00E-03 | 3.55E-03 | 7.16E-04 | 1.41 | 20.2% | 6.95E-03 | 8.67E-04 | 1.39 | 12.5% | 0 | - | - | - |
|  | 6.25E-04 | 3.01E-04 | 2.16E-04 | 2.08 | 71.6% | 8.66E-04 | 6.00E-04 | 1.39 | 69.3% | 0 | - | - | - |
