# Supplementary material for: Evaluation of four commercial quantitative real-time PCR kits with inhibited and degraded samples
Source: Springer Nature journal article supplement (doi:10.1007/s00414-017-1745-9), 2017-11-24
Supplement: MOESM4 [file 15251672]

**Supplemental Table 4.** Sensitivity and Accuracy results of NIST SRM 2372 Component A and Component B dilutions for PowerQuant System

| Sample Source | Expected Conc. (ng/µL) | Observed Small | | | | Observed Large | | | | Observed Y | | | |
| --- | --- | --- | --- | --- | --- | --- | --- | --- | --- | --- | --- | --- | --- |
| Avg. Quantity | Std. Dev. | Fold Change | %CV | Avg. Quantity | Std. Dev. | Fold Change | %CV | Avg. Quantity | Std. Dev. | Fold Change | %CV |
| NIST A SRM | 57.0 | 62.2 | 6.9 | 1.09 | 11.0% | 61.0 | 1.1 | 1.07 | 1.8% | 56.0 | 0.8 | 1.11 | 1.5% |
|  | 20.0 | 21.3 | 1.6 | 1.07 | 7.7% | 23.5 | 1.2 | 1.17 | 5.0% | 22.0 | 1.6 | 1.10 | 7.2% |
|  | 2.50 | 2.40 | 0.42 | 1.04 | 17.4% | 2.67 | 0.25 | 1.07 | 9.3% | 2.79 | 0.21 | 1.12 | 7.6% |
|  | 0.313 | 0.295 | 0.009 | 1.06 | 3.0% | 0.302 | 0.015 | 1.04 | 4.9% | 0.351 | 0.010 | 1.12 | 2.8% |
|  | 0.0390 | 0.0292 | 0.0017 | 1.33 | 5.9% | 0.0289 | 0.0011 | 1.35 | 3.8% | 0.0422 | 0.0089 | 1.08 | 21.2% |
|  | 5.00E-03 | 4.04E-03 | 6.27E-04 | 1.24 | 15.5% | 3.37E-03 | 4.57E-04 | 1.48 | 13.5% | 6.16E-03 | 1.16E-03 | 1.23 | 18.8% |
|  | 6.25E-04 | 3.00E-04 | 1.00E-04 | 2.08 | 33.3% | 2.00E-04 | 0.00E+00 | 3.13 | 0.0% | 8.00E-04 | 1.00E-03 | 1.28 | 125.0% |
|  |  |  |  |  |  |  |  |  |  |  |  |  |  |
| NIST B SRM | 61.0 | 60.2 | 3.0 | 1.01 | 5.0% | 49.0 | 1.8 | 1.24 | 3.6% | 0 | - | - | - |
|  | 20.0 | 20.1 | 2.3 | 1.00 | 11.4% | 17.0 | 0.5 | 1.18 | 2.8% | 0 | - | - | - |
|  | 2.50 | 2.37 | 0.37 | 1.05 | 15.6% | 2.07 | 0.34 | 1.21 | 16.4% | 0 | - | - | - |
|  | 0.313 | 0.324 | 0.017 | 1.03 | 5.3% | 0.263 | 0.016 | 1.19 | 6.1% | 0 | - | - | - |
|  | 0.0390 | 0.0345 | 0.0042 | 1.13 | 12.3% | 0.0287 | 0.0042 | 1.36 | 14.8% | 0 | - | - | - |
|  | 5.00E-03 | 2.84E-03 | 6.33E-04 | 1.76 | 22.3% | 1.87E-03 | 3.00E-04 | 2.68 | 16.1% | 0 | - | - | - |
|  | 6.25E-04 | 2.29E-04 | 2.62E-04 | 2.73 | 114.4% | 1.65E-04 | 1.70E-04 | 3.79 | 103.0% | 0 | - | - | - |
