# Supplementary material for: Evaluation of four commercial quantitative real-time PCR kits with inhibited and degraded samples
Source: Springer Nature journal article supplement (doi:10.1007/s00414-017-1745-9), 2017-11-24
Supplement: MOESM8 [file 15251672]

**Supplemental Figure 3.** Averageinhibition indices for 0.5ng/uL standard DNA spiked with varying concentrations of calcium. Data represents mean ± Std Dev. An **x** denotes when inhibition was flagged by a kits’ default setting (as listed in Table 1).
